# Supplementary material for: A novel nanocatalyst praseodymium oxide (Pr6O11) for the efficient and sustainable synthesis of chromene derivatives via ultrasound irradiation in an aqueous hydrotropic medium
Source: Royal Society of Chemistry journal article supplement (doi:10.1039/d5ra03100a), 2025-01-01

## **A Novel Nano-Catalyst Praseodymium Oxide (Pr<sub>6</sub>O<sub>11</sub>) for Efficient and Sustainable Synthesis of Chromene Derivatives by Ultrasound Irradiation in Aqueous Hydrotopic medium**

**Sarika Patil<sup>a</sup>, Nilesh Pandit<sup>b</sup>, Avdhut Kadam<sup>b</sup>, Suraj Attar<sup>c</sup>, Chaitali Bagade<sup>d</sup>,  
Dattaprasad Pore<sup>d</sup>, Santosh Kamble<sup>\*b</sup>**

<sup>a,b</sup> Department of Chemistry, S.G.M. College Karad, Satara-415001, Maharashtra, India

<sup>b</sup> Department of Chemistry, Yashavantrao Chavan Institute of Science, Lead College,  
Karmaveer Bhaurao Patil University, Satara-415001, Maharashtra, India

<sup>c</sup> Department of Chemistry, Shahajiraje Mahavidyalaya, Khatav, Satara, 415505,  
Maharashtra, India

<sup>d</sup> Department of Chemistry, Shivaji University, Kolhapur, 416004, Maharashtra, India

Santosh Kamble: Orcid Id: 0000-0002-4668-1628

Email: [santosh.san143@gmail.com](mailto:santosh.san143@gmail.com)

Supporting Data

### **Index**

#### **Table of Contents**

1. General
2. Figure 1. FT-IR spectrum of **2-Amino-3-cyano-7-hydroxy-4-(3,4,5-trimethoxy)-4H-chromene** (Table-4, Entry-4g)
3. Figure 2 <sup>1</sup>H NMR spectrum of **2-Amino-3-cyano-7-hydroxy-4-(3,4,5-trimethoxy)-4H-chromene**(Table-4, Entry-4g)
4. Figure 3. <sup>13</sup>C NMR spectrum of **2-Amino-3-cyano-7-hydroxy-4-(3,4,5-trimethoxy)-4H-chromene**(Table-4, Entry-4g)
5. Figure 4. FT-IR spectrum of **2-Amino-3-cyano-7-hydroxy-4-(4-nitrophenyl)-4H-chromene**.  
(Table-4, Entry-4b)
6. Figure 5. <sup>1</sup>H NMR spectrum of **2-Amino-3-cyano-7-hydroxy-4-(4-nitrophenyl)-4H-chromene**.  
(Table-4, Entry-4b)
7. Figure 6. <sup>13</sup>C NMR spectrum of **2-Amino-3-cyano-7-hydroxy-4-(4-nitrophenyl)-4H-chromene**.  
(Table-4, Entry-4b)
8. Figure 7. FT-IR spectrum of **2-Amino-4-(4-chlorophenyl)-3-cyano-7-hydroxy-4H-chromene**.(Table-4, Entry-4f)
9. Figure 8. <sup>1</sup>H NMR spectrum of **2-Amino-4-(4-chlorophenyl)-3-cyano-7-hydroxy-4H-chromene**.(Table-4, Entry-4f)

10. Figure 9.  $^{13}\text{C}$  NMR spectrum of **2-Amino-4-(4-chlorophenyl)-3-cyano-7-hydroxy-4H-chromene**.(Table-4, Entry-4f)

11. Figure 2  $^1\text{H}$  NMR spectrum of **2-Amino-3-cyano-7-hydroxy-4-(3,4-dimethoxy)-4H-chromene**.(Table-4, Entry-4e)

12. Figure 3.  $^{13}\text{C}$  NMR spectrum of **2-Amino-3-cyano-7-hydroxy-4-(3,4-dimethoxy)-4H-chromene**.(Table-4, Entry-4e)

13. XRD of  $\text{Pr}_6\text{O}_{11}$

## General

All chemicals were garnered from Loba and Sigma-Aldrich chemical companies and used without any else purification. Double distilled water was employed as an aqueous medium. The  $^1\text{H}$  and  $^{13}\text{C}$  NMR spectra were recorded at 400 and 100 MHz, respectively.

## Experimental Procedure: -

. In order to develop a green protocol and check the viability of the reaction in the aqueous and partially alcoholic media, a long screening test involving various parameters like catalyst, NaPTS, application of ultrasound frequencies, and the solvents being fully or partially aqueous; a method development has been carried out. The developed method is nomenclatured as 'model reaction 2'. Aqueous solutions of 0.101 mL of 1 mM Benzaldehyde, 0.063 mL of 1 mM malononitrile, 0.11 g of 1 mM resorcinol, and 20 % NaPTS were added in a container. To these reactants, 0.01 g of 10 mol%  $\text{Pr}_6\text{O}_{11}$  NPs were added as a catalyst. These reactants were then subjected to ultrasound irradiations at room temperature for five minutes, and the progress of the reaction was monitored on TLC (ethyl acetate: hexane 8:2). The product was filtered with the Whatman filter paper no. 41 to separate the catalyst ( $\text{Pr}_6\text{O}_{11}$ ) NPs. The catalyst NPs were preserved for the recyclability test. The product devoid of catalyst obtained after filtration was re-crystallized by Ethanol and characterized by  $^1\text{H}$  NMR and  $^{13}\text{C}$  NMR spectroscopy.

**Spectroscopic data:**

**Compound-1[Entry-4g] -: 2-Amino-3-cyano-7-hydroxy-4-(3,4,5-trimethoxy)-4H-chromene.**

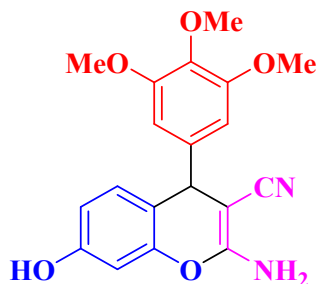

**IR (KBr)cm<sup>-1</sup>:** 3600 (-OH), 3450 (-NH<sub>2</sub>), 2963 (Ar-CH), 2225(-CN), 1660,(aromatic), 1130, 1150, 1260 (C-O)

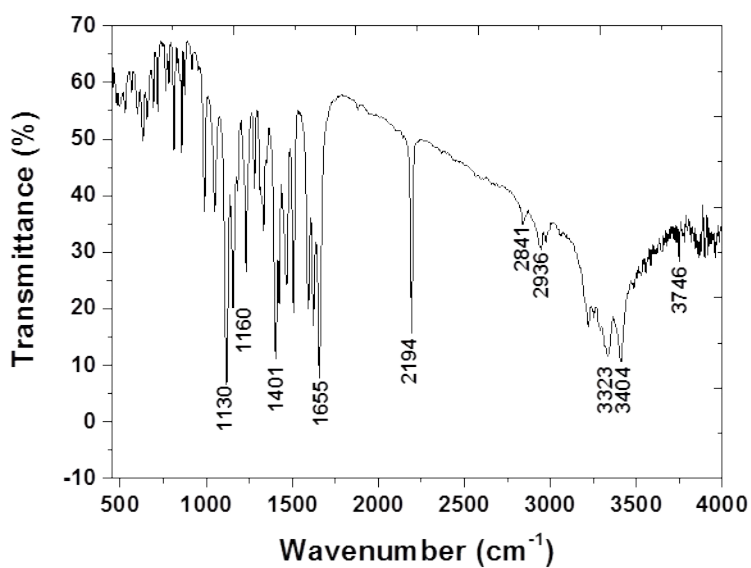

**<sup>1</sup>H-NMR: -**

<sup>1</sup>H NMR (400 MHz DMSO-d<sub>6</sub>): 3.67 (s, 9H, OMe), 4.47 (s, 1H, CH), 6.40 (s, 2H, NH<sub>2</sub>), 6.69-6.73 (m, 4H), 7.83(dd,1H), 9.34(s, 1H, OH)

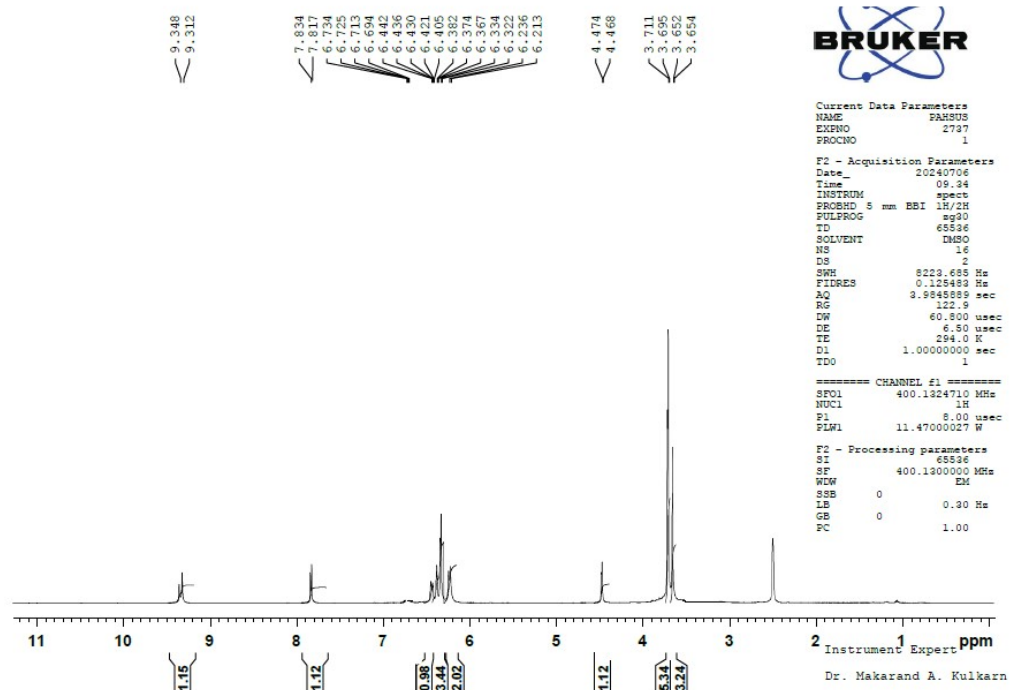

### <sup>13</sup>C-NMR: -

<sup>13</sup>C NMR (400 MHz DMSO-d<sub>6</sub>) δ(ppm): 161.42, 156.21, 152.02, 148.01, 142.96, 137.22, 129.32, 122.21, 113.88, 113.70, 112.6, 113.70, 105.23, 103.88, 61.54, 57.28.

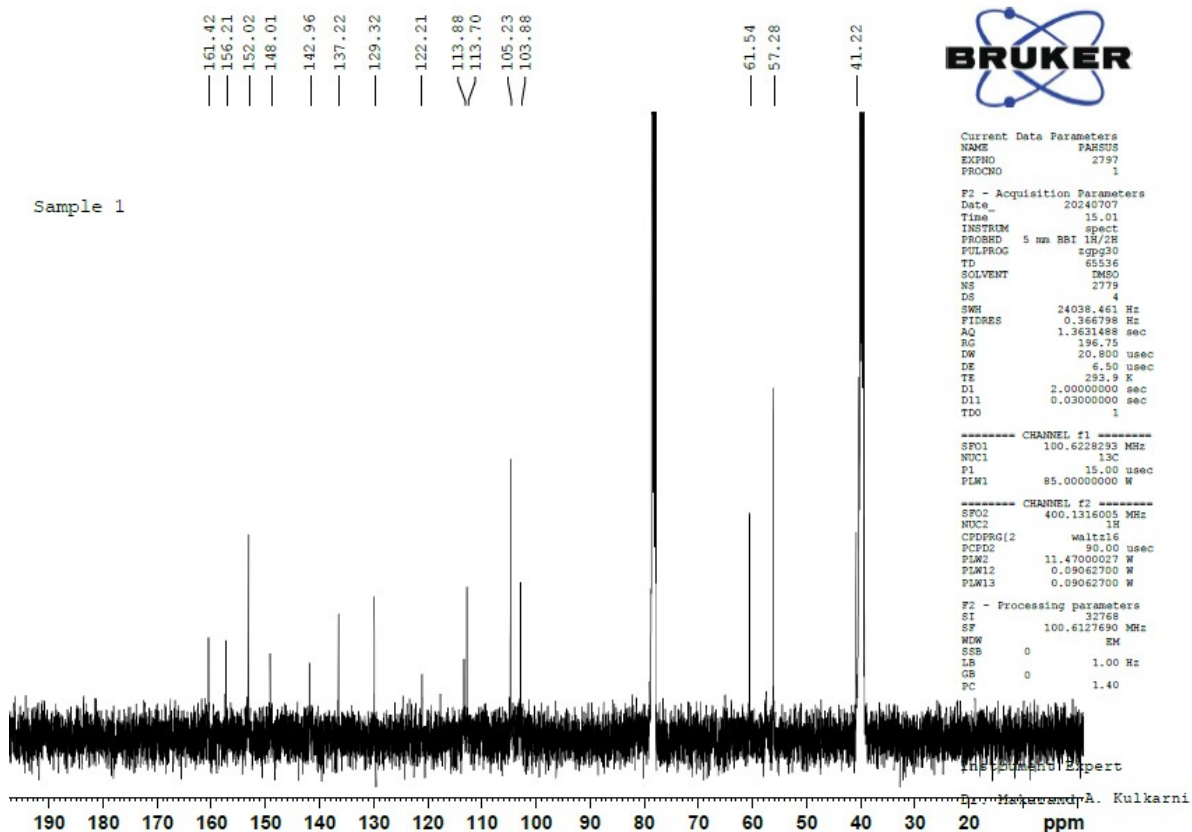

Compound-2[Entry-4b]: - 2-Amino-3-cyano-7-hydroxy-4-(4-nitrophenyl)-4H-chromene.

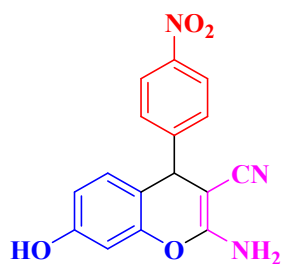

IR (KBr) $\text{cm}^{-1}$ : 3500 (-OH), 3450 (-NH<sub>2</sub>), 2950 (Ar-CH), 2225 (CN), 1660, 1580 (aromatic), 1490 (NO<sub>2</sub>), 1250, 1120 (C-O)

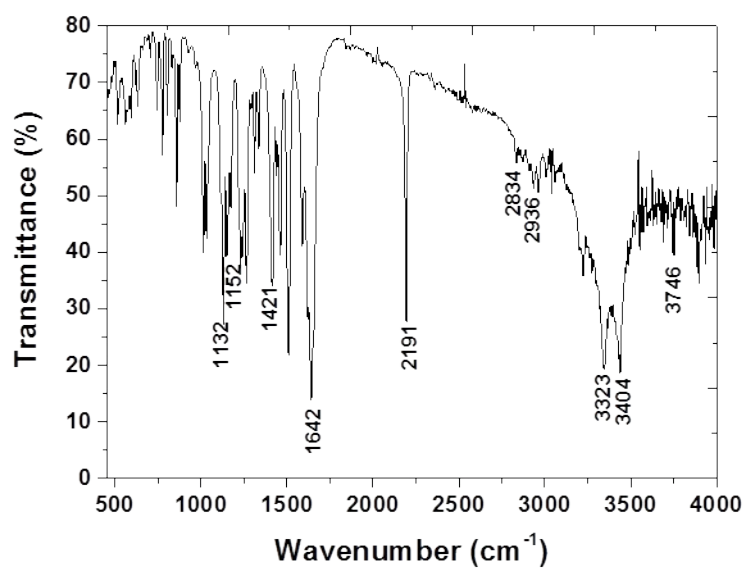

**<sup>1</sup>H-NMR: -**

<sup>1</sup>H NMR (400 MHz DMSO-d<sub>6</sub>) δ ppm: 4.68 (s, 1H, CH), 6.19(s, 2H, NH<sub>2</sub>), 6.42-6.45 (m, 2H, ortho to Ar-OH), 6.60-6.63 (d, 1H, J = 8.00 meta to Ar-OH), 7.2-7.3(m, 2H, meta to Ar-NO<sub>2</sub>), 8.02-8.05 (m, 2H, ortho to Ar-NO<sub>2</sub>), 9.38 (s, 1H, OH);

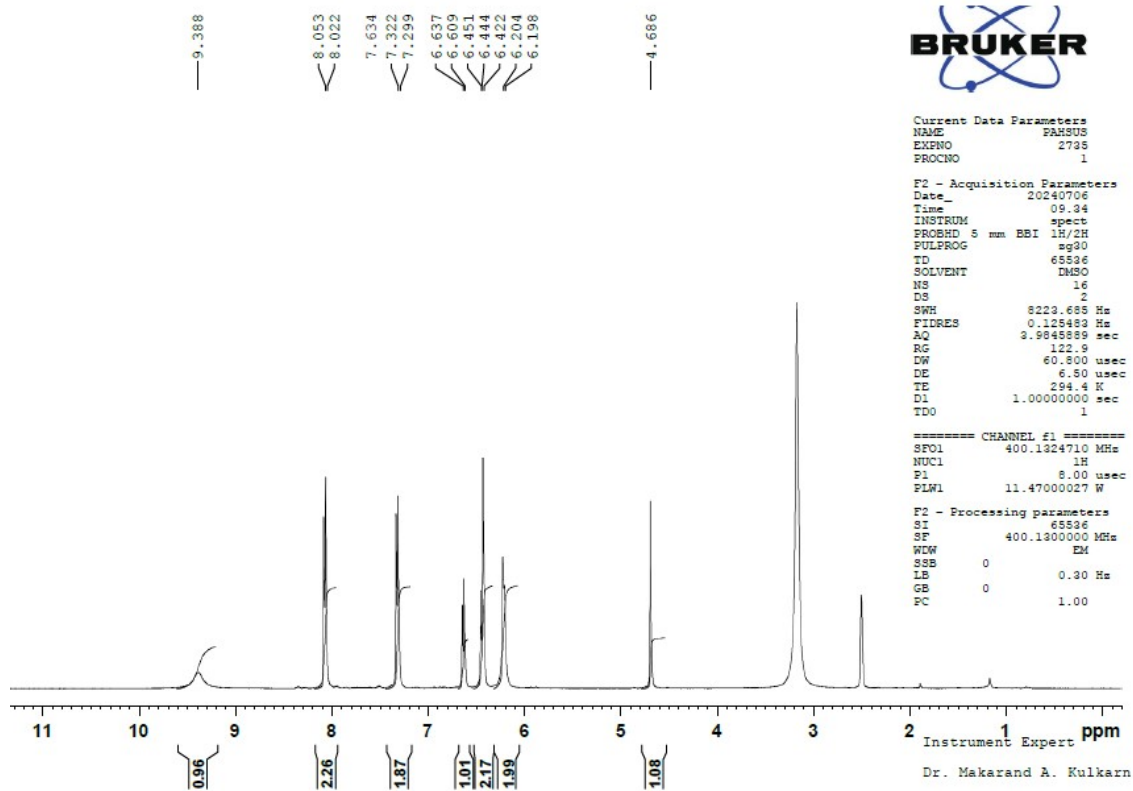



**<sup>13</sup>C-NMR: -**

<sup>13</sup>C NMR (400 MHz DMSO- d<sub>6</sub>) δ (ppm): 160.69, 157.54, 153.72, 149.32, 146.77, 129.99, 128.88, 123.78, 120.61, 113.21, 111.88, 103.32, 56.42.

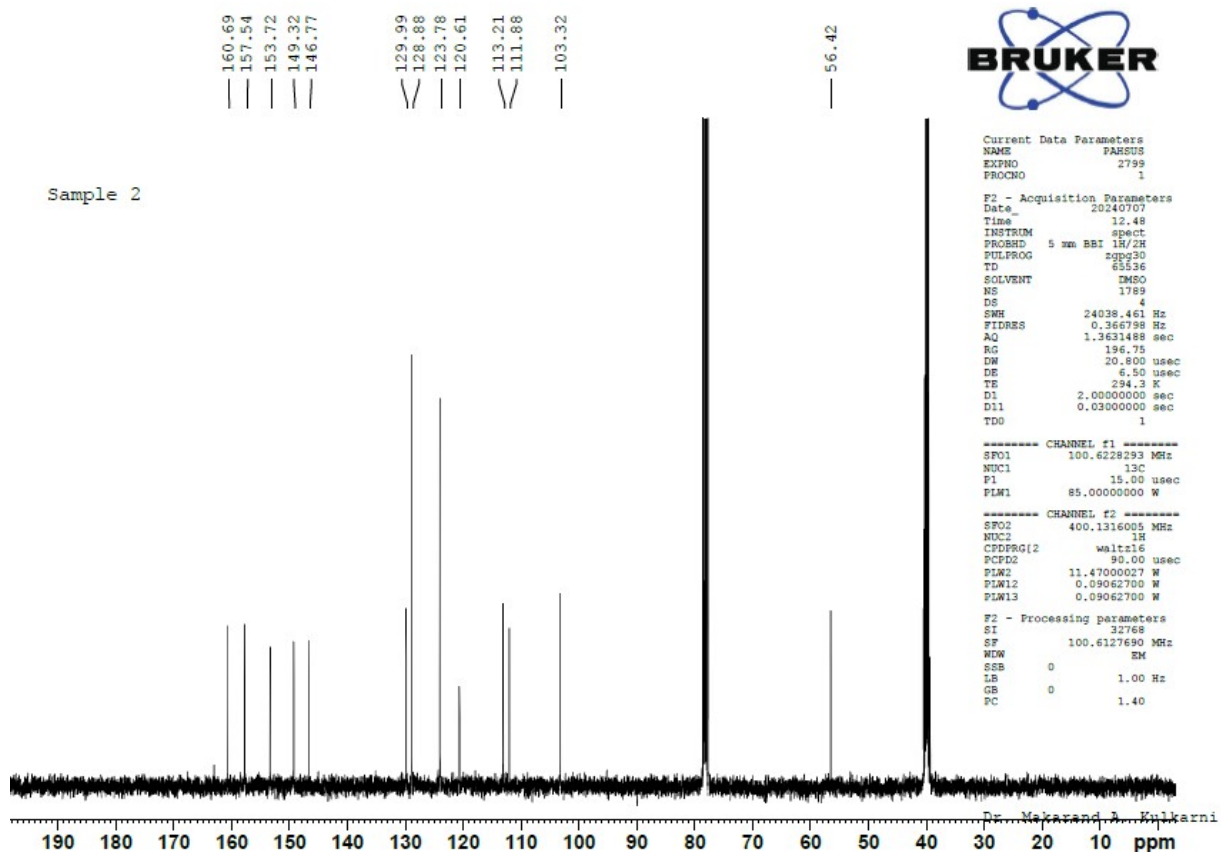

**Compound-3[Entry-4f]: - 2-Amino-4-(4-chlorophenyl)-3-cyano-7-hydroxy-4H-chromene.**

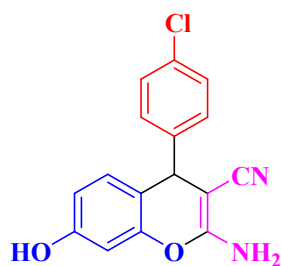

**IR ((KBr)cm<sup>-1</sup>):** 3500(-OH), 3350(-NH<sub>2</sub>),2225(-CN), 1640 (aromatic),1120,1242 (C-O).

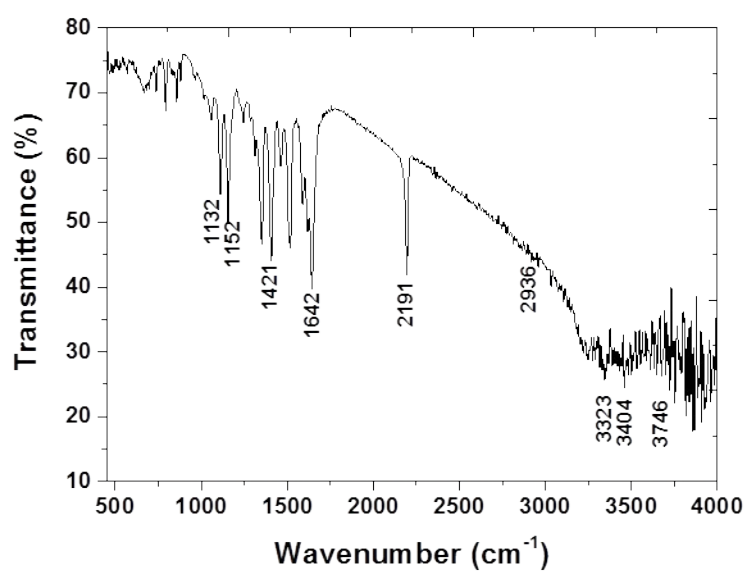

# <sup>1</sup>H-NMR: -

<sup>1</sup>H-NMR (ppm) <sup>1</sup>H NMR (400MHz DMSO-d<sub>6</sub>) δ ppm: 4.45 (s, 1H, CH), 5.9-6.3 (d, 2H, ortho to Ar-OH), 6.53 (d, 1H, meta to Ar-OH), 6.32-6.34 (s, 2H, NH<sub>2</sub>), 7.07-7.10 (d, 2H, J<sub>1/4</sub>8.04Hz, meta to Ar-NO<sub>2</sub>), 7.57-7.61 (d, 2H, J<sub>1/4</sub> 8.40Hz, ortho to ArNO<sub>2</sub>), 9.22 (s, 1H, OH).

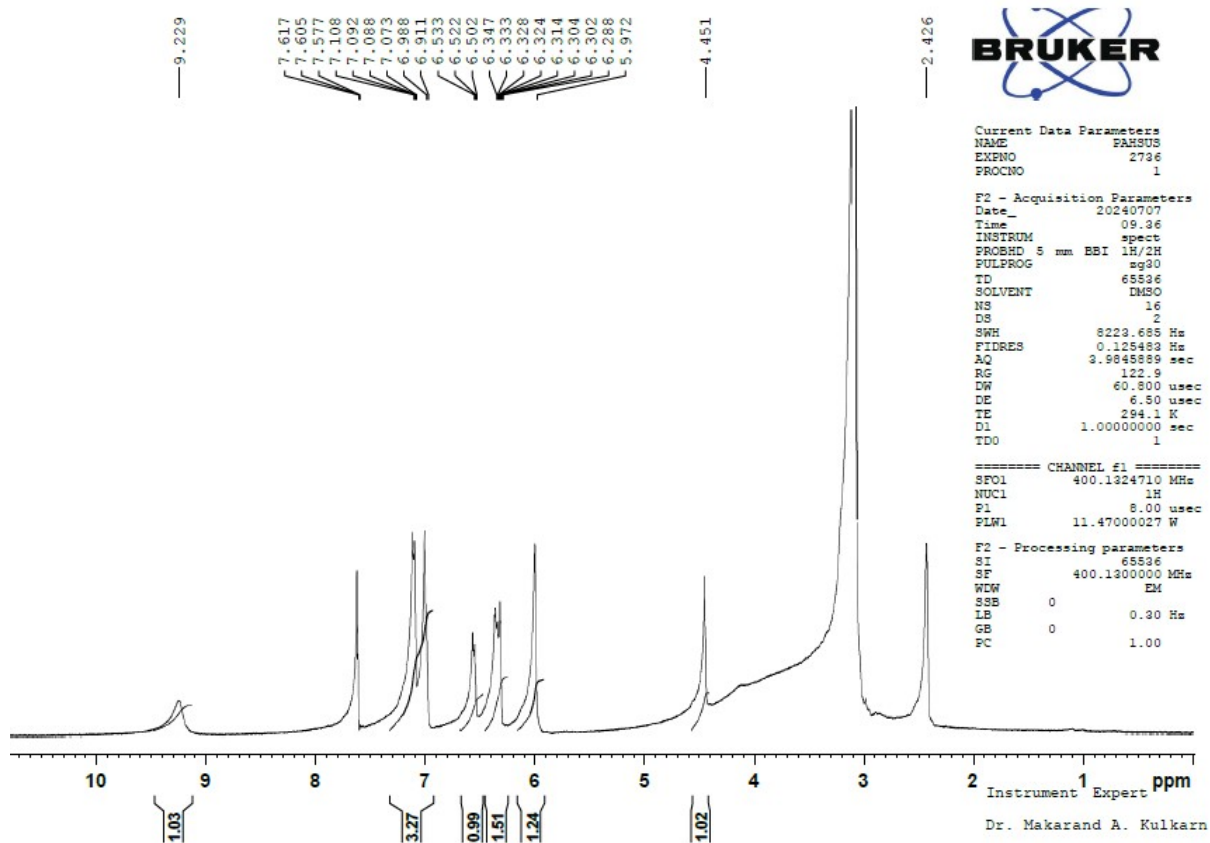

**<sup>13</sup>C-NMR: -**

<sup>13</sup>CNMR (400MHz DMSO-d<sub>6</sub>) δ(ppm): 160.79, 157.12, 149.76, 144.88, 132.81, 128.56, 120.33, 112.31, 102.11, 78.22, 57.52.

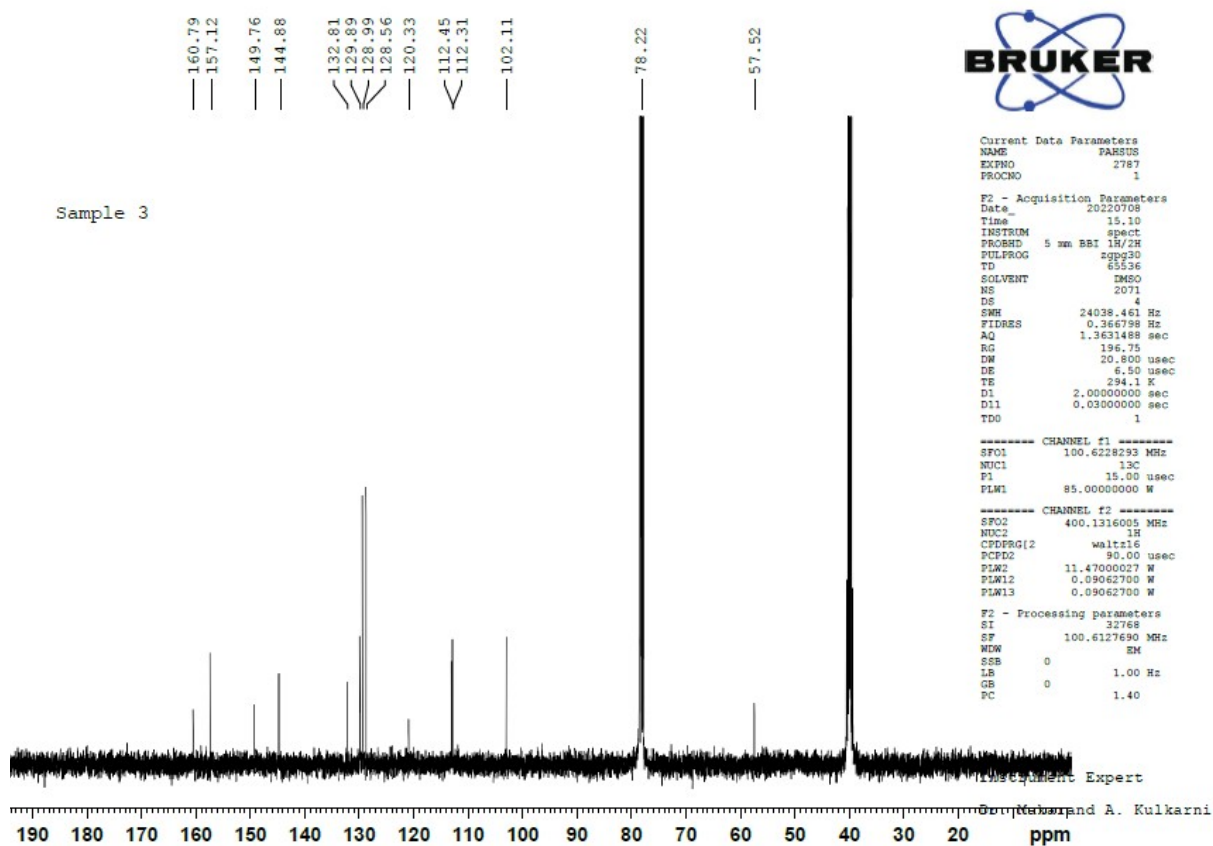

**Compound-4 [Entry-4e]: - 2-Amino-3-cyano-7-hydroxy-4-(3,4-dimethoxy)-4H-chromene.**

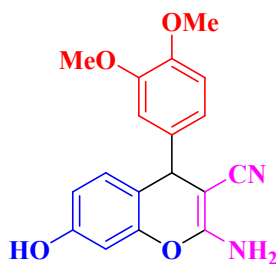

**<sup>1</sup>H-NMR: -**

<sup>1</sup>H NMR (400MHz DMSO-d<sub>6</sub>) δ(ppm): 3.72 (s, 6H, OMe), 4.47 (s, 1H, CH), 6.40 (s, 2H, NH<sub>2</sub>), 6.37-6.41 (d, 2H, ortho to Ar-OH), 6.61-6.64 (dd, 1H, meta to Ar-OH), 6.65-6.74 (d, 6H-Ar(OMe)<sub>2</sub>), 9.32 (s, 1H, OH);

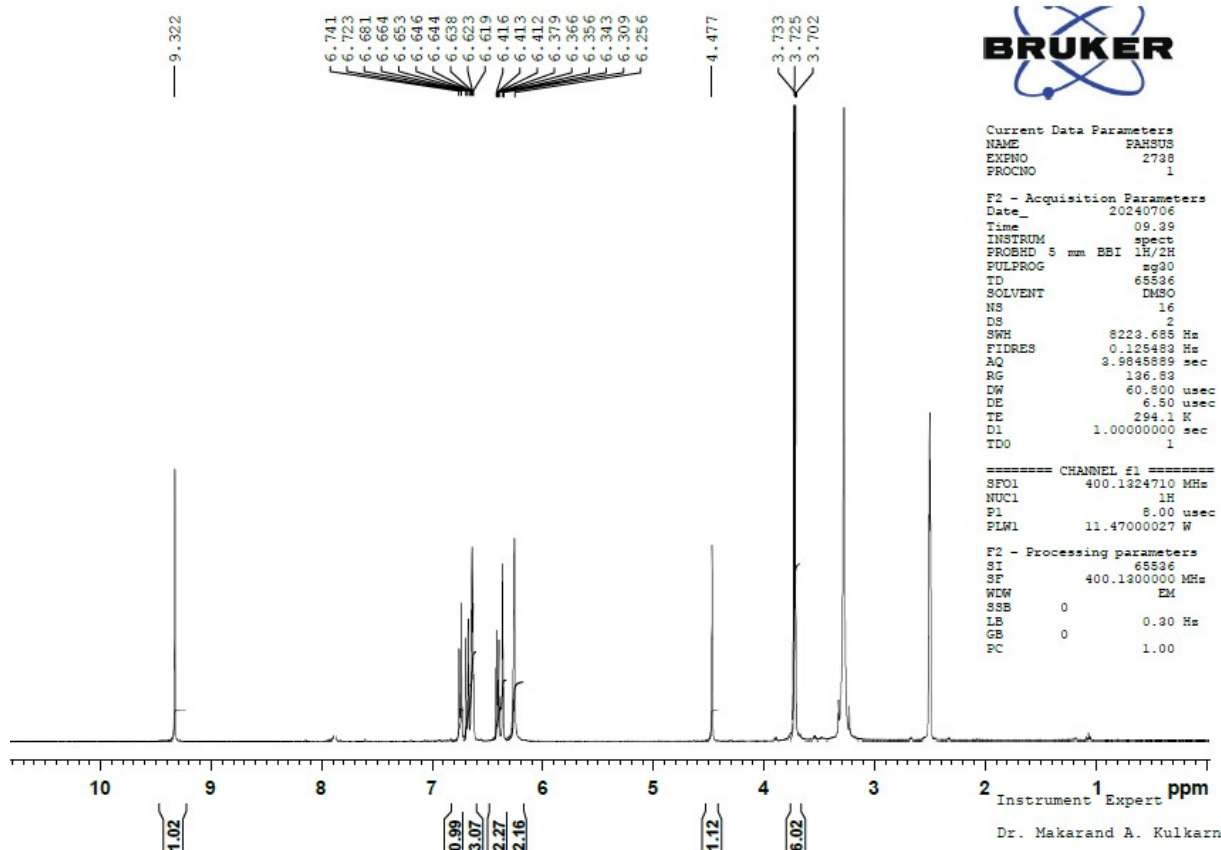

**<sup>13</sup>C-NMR: -**

<sup>13</sup>C NMR (400MHz DMSO-d<sub>6</sub>) δ(ppm): 161.42, 158.28, 150.16, 149.99, 148.81, 139.95, 128.98, 122.01, 119.98, 114.81, 113.68, 112.75, 112.37, 103.73, 58.39, 56.23.

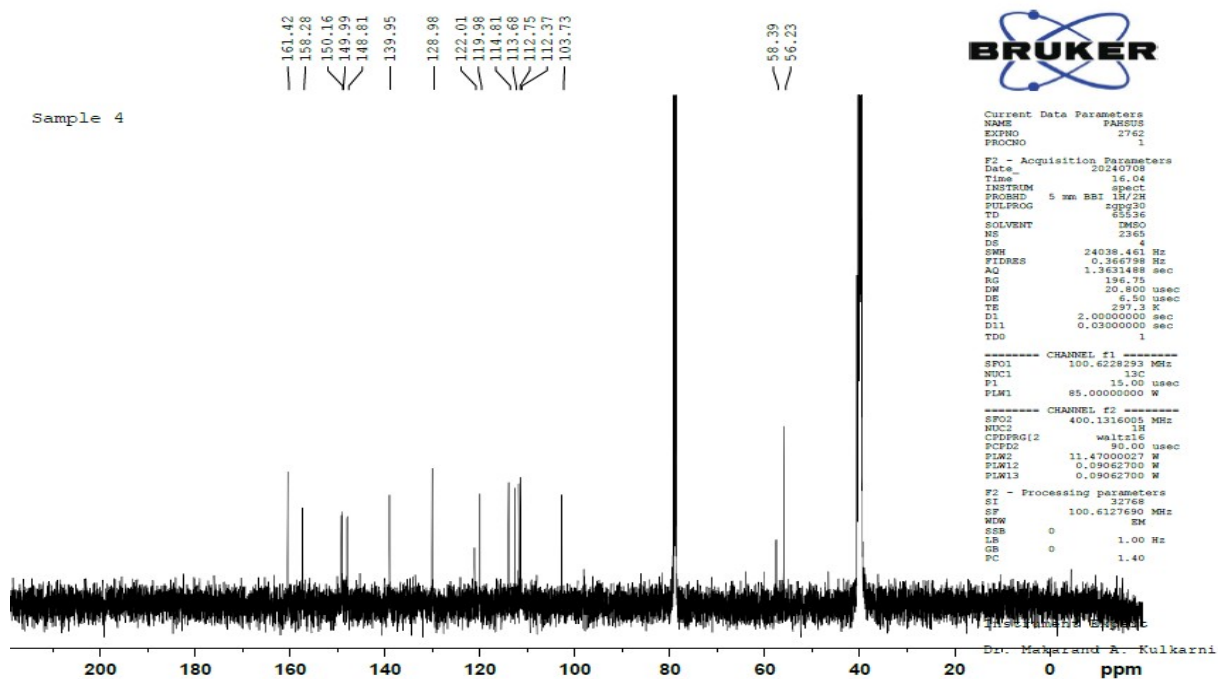

### 13. XRD of $\text{Pr}_6\text{O}_{11}$

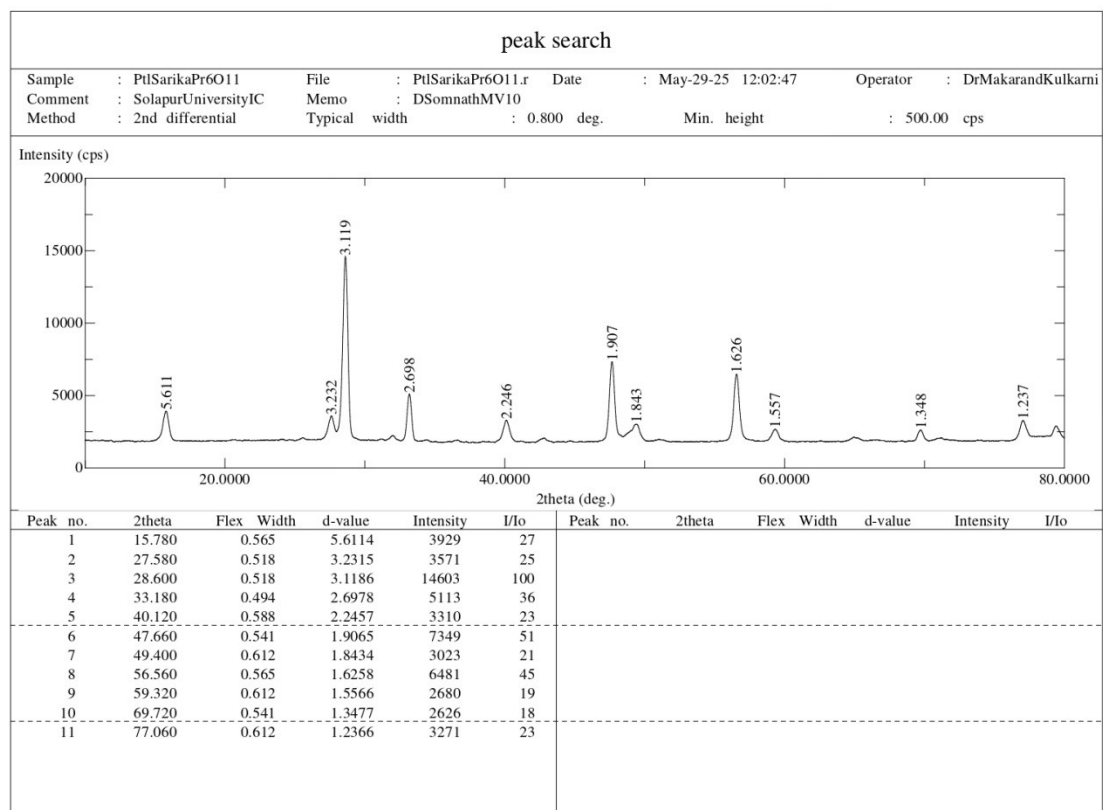

Supplement: d5ra03100a1.pdf [file d5ra03100a1.pdf]
